# Supplementary material
Source: publisher figshare collection journal article supplement (https://geolsoc.figshare.com/articles/dataset/_/3453758)
Supplement: Supplementary file 1 [file 1]

FIB-C

Chl vein

FIB-A&B
